# Supplementary material for: Microbial Efflux Pump Inhibitors: A Journey around Quinoline and Indole Derivatives
Source: MDPI journal article supplement (doi:10.3390/molecules26226996), 2021-11-19
Supplement: s1 [file s1]

**Table S1.** Chemical name and structure of the described EPI compounds

| Compd | Structure | Name                                                                                                                          |
|-------|-----------|-------------------------------------------------------------------------------------------------------------------------------|
| 1     |           | 5-nitro-2-phenyl-1 <i>H</i> -indole                                                                                           |
| 2     |           | (4-(benzyloxy)-2-(5-nitro-1 <i>H</i> -indol-2-yl)phenyl)methanol                                                              |
| 3     |           | 2-(2-(azidomethyl)-5-methoxyphenyl)-5-nitro-1 <i>H</i> -indole                                                                |
| 4     |           | 2-phenylbenzo[ <i>b</i> ]thiophene-3-carbaldehyde                                                                             |
| 5     |           | 2-(pyridin-3-yl)benzo[ <i>b</i> ]thiophene-3-carbaldehyde                                                                     |
| 6     |           | 2-phenylbenzofuran-3-carbaldehyde                                                                                             |
| 7     |           | methyl 3-(5-nitro-1 <i>H</i> -indol-2-yl)benzoate                                                                             |
| 8     |           | (4-(5-nitro-1 <i>H</i> -indol-2-yl)phenyl)methanol                                                                            |
| 9     |           | ( <i>Z</i> )- <i>N</i> -benzylidene-2-(( <i>tert</i> -butoxycarbonyl)amino)-1-(5-iodo-1 <i>H</i> -indol-3-yl)ethanamine oxide |
| 10    |           | (2-phenyl-6-(phenylamino)benzo[ <i>b</i> ]thiophen-3-yl)methanol                                                              |
| 11    |           | 6-hydroxy-2-phenylbenzo[ <i>b</i> ]thiophene-3-carbonitrile                                                                   |

|    |                                                                                     |                                                                                                                                            |
|----|-------------------------------------------------------------------------------------|--------------------------------------------------------------------------------------------------------------------------------------------|
| 12 | 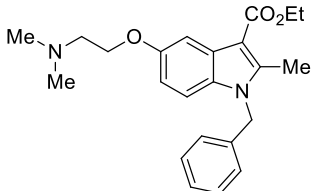   | ethyl 1-benzyl-5-(2-(dimethylamino)ethoxy)-2-methyl-1 <i>H</i> -indole-3-carboxylate                                                       |
| 13 |    | ethyl 1-benzyl-2-methyl-5-nitro-1 <i>H</i> -indole-3-carboxylate                                                                           |
| 14 |    | ethyl 5-(3-aminopropoxy)-1-benzyl-2-methyl-1 <i>H</i> -indole-3-carboxylate                                                                |
| 15 |    | diethyl 5,5'-((azanediylbis(2-hydroxypropane-3,1-diyl))bis(oxy))bis(1-benzyl-2-methyl-1 <i>H</i> -indole-3-carboxylate)                    |
| 16 |   | ethyl 5-(3-(4-(3-((1,1'-biphenyl)-2-yloxy)propyl)piperazin-1-yl)propoxy)-1-benzyl-2-methyl-1 <i>H</i> -indole-3-carboxylate                |
| 17 |  | ethyl 1-benzyl-5-(2-((3-methoxy-4-((1-phenyl-1 <i>H</i> -tetrazol-5-yl)oxy)benzyl)amino)ethoxy)-2-methyl-1 <i>H</i> -indole-3-carboxylate  |
| 18 |  | ethyl 1-benzyl-5-(3-((3-methoxy-4-((1-phenyl-1 <i>H</i> -tetrazol-5-yl)oxy)benzyl)amino)propoxy)-2-methyl-1 <i>H</i> -indole-3-carboxylate |
| 19 |  | ethyl 1-benzyl-5-(4-((3-methoxy-4-((1-phenyl-1 <i>H</i> -tetrazol-5-yl)oxy)benzyl)amino)butoxy)-2-methyl-1 <i>H</i> -indole-3-carboxylate  |

|    |  |                                                                                                                 |
|----|--|-----------------------------------------------------------------------------------------------------------------|
| 20 |  | <i>N,N</i> -diethyl-2-((2-(4-propoxyphenyl)quinolin-4-yl)oxy)ethanamine                                         |
| 21 |  | 4-(2-(piperidin-1-yl)ethoxy)-2-(4-propoxyphenyl)quinoline                                                       |
| 22 |  | 4-(2-(azepan-1-yl)ethoxy)-2-(4-propoxyphenyl)quinoline                                                          |
| 23 |  | 4-(2-(piperazin-1-yl)ethoxy)-2-(4-propoxyphenyl)quinoline                                                       |
| 24 |  | 6-methoxy-4-(2-(piperidin-1-yl)ethoxy)-2-(4-propoxyphenyl)quinoline                                             |
| 25 |  | 4-(2-(6,7-dimethoxy-3,4-dihydroisoquinolin-2(1 <i>H</i> )-yl)ethoxy)-6,7-dimethoxy-2-(4-propoxyphenyl)quinoline |
| 26 |  | 2-((6-(benzyloxy)-2-(4-propoxyphenyl)quinolin-4-yl)oxy)- <i>N,N</i> -diethylethanamine                          |
| 27 |  | 6-(benzyloxy)-4-(2-(piperidin-1-yl)ethoxy)-2-(4-propoxyphenyl)quinoline                                         |

|    |  |                                                                                                                        |
|----|--|------------------------------------------------------------------------------------------------------------------------|
| 28 |  | 2-((2-(5-chlorothiophen-2-yl)quinolin-4-yl)oxy)- <i>N,N</i> -diethylethanamine                                         |
| 29 |  | <i>N</i> -(2-(piperidin-1-yl)ethyl)-2-(4-propoxyphenyl)quinoline-4-carboxamide                                         |
| 30 |  | 3,3'-((2,8,10-trimethylpyrido[3,2- <i>g</i> ]quinoline-4,6-diyl)bis(oxy))bis( <i>N,N</i> -dimethylpropan-1-amine)      |
| 31 |  | 2,2'-((2,8,10-trimethylpyrido[3,2- <i>g</i> ]quinoline-4,6-diyl)bis(sulfaneydiyl))bis( <i>N,N</i> -dimethylethanamine) |
| 32 |  | 8-methyl-7-nitro-4-((3-(piperidin-1-yl)propyl)thio)quinoline                                                           |
| 33 |  | 8-methyl-7-nitro- <i>N</i> -(2-(piperidin-1-yl)ethyl)quinolin-4-amine                                                  |
| 34 |  | 8-methyl- <i>N</i> -(3-morpholinopropyl)-7-nitroquinolin-4-amine                                                       |
| 35 |  | 2,8-dimethyl-4-(2-(pyrrolidin-1-yl)ethoxy)quinoline                                                                    |
| 36 |  | 7-chloro- <i>N</i> -(2-(piperidin-1-yl)ethyl)quinolin-4-amine                                                          |

|    |                                                                                     |                                                                                                                                                    |
|----|-------------------------------------------------------------------------------------|----------------------------------------------------------------------------------------------------------------------------------------------------|
| 37 | 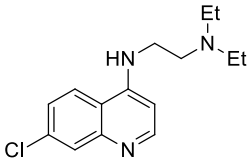   | <i>N</i> <sup>1</sup> -(7-chloroquinolin-4-yl)- <i>N</i> <sup>2</sup> , <i>N</i> <sup>2</sup> -diethylethane-1,2-diamine                           |
| 38 |    | <i>N</i> <sup>1</sup> -(7-chloroquinolin-4-yl)- <i>N</i> <sup>2</sup> , <i>N</i> <sup>2</sup> -diisopropylethane-1,2-diamine                       |
| 39 |    | 3-amino-1 <i>H</i> -indole-6-carboxylic acid                                                                                                       |
| 40 |    | 3-nitro-1 <i>H</i> -indol-6-amine                                                                                                                  |
| 41 |    | (2 <i>E</i> ,2' <i>E</i> )- <i>N,N'</i> -((butane-1,4-diylbis(azanediyl))bis(propane-3,1-diyl))bis(3-(5-methoxy-1 <i>H</i> -indol-3-yl)acrylamide) |
| 42 |   | <i>N,N'</i> -((pentane-1,5-diylbis(azanediyl))bis(propane-3,1-diyl))bis(2-(5-bromo-1 <i>H</i> -indol-3-yl)acetamide)                               |
| 43 |  | 6-fluoro-1-(2-(piperidin-1-yl)ethyl)-3-(4-propoxyphenyl)quinolin-4(1 <i>H</i> )-one                                                                |
| 44 |  | 1-(2-(diethylamino)ethyl)-6-isopropyl-3-(4-propoxyphenyl)quinolin-4(1 <i>H</i> )-one                                                               |
